# Supplementary material for: CircKEAP1 Suppresses the Progression of Lung Adenocarcinoma via the miR-141-3p/KEAP1/NRF2 Axis
Source: Front Oncol. 2021 May 31;11:672586. doi: 10.3389/fonc.2021.672586 (PMC8200847; doi:10.3389/fonc.2021.672586)
Supplement: Supplementary file 7 [file Table_7.xlsx]

## Sheet: Sheet1
Table s7. the potential binding sites of miRNAs in the circKEAP1 by Targetscan.
Motif Name	Position	Length	Sequence
hsa-let-7b-5p	465 ~ 485	21	gcctacacggcctccatctcc
hsa-let-7b-5p	192 ~ 213	22	aaccgcaccttcagctacaccc
hsa-let-7d-3p	397 ~ 419	23	agcagggcatggaggtggtgtcc
hsa-let-7d-5p	72 ~ 93	22	ggggctggggcctgctgccgat
hsa-let-7e-3p	613 ~ 639	27	acttcgctgagcagattggctgtgtgg
hsa-let-7e-5p	465 ~ 485	21	gcctacacggcctccatctcc
hsa-let-7g-3p	554 ~ 578	25	tgcctgcagtgacttcctggtgcag
hsa-let-7g-3p	70 ~ 91	22	gcggggctggggcctgctgccg
hsa-miR-100-5p	372 ~ 398	27	gccatgttcaccaacgggctgcgggag
hsa-miR-103a-3p	325 ~ 349	25	tcatggcccacaaggtggtgctggc
hsa-miR-105-5p	389 ~ 410	22	gctgcgggagcagggcatggag
hsa-miR-106b-3p	575 ~ 600	26	gcagcagctggaccccagcaatgcca
hsa-miR-106b-3p	266 ~ 293	28	ccagcagctgtgtgacgtcacactgcag
hsa-miR-122-5p	130 ~ 153	24	gggacgcggtgatgtacgcctcca
hsa-miR-122-5p	446 ~ 480	35	ggagcgcctcattgaattcgcctacacggcctcca
hsa-miR-124-3p	638 ~ 659	22	ggagttgcaccagcgtgcccgg
hsa-miR-124-5p	125 ~ 149	25	ggcaggggacgcggtgatgtacgcc
hsa-miR-124-5p	435 ~ 465	31	cccaaggtcatggagcgcctcattgaattcg
hsa-miR-125a-3p	177 ~ 203	27	ccctcccagcatggcaaccgcaccttc
hsa-miR-125a-3p	259 ~ 291	33	ggctcagccagcagctgtgtgacgtcacactgc
hsa-miR-125a-5p	396 ~ 428	33	gagcagggcatggaggtggtgtccattgagggt
hsa-miR-125a-5p	59 ~ 83	25	tcccaggcctagcggggctggggcc
hsa-miR-125b-5p	383 ~ 404	22	caacgggctgcgggagcagggc
hsa-miR-126-5p	6 ~ 26	21	tgagtgccagaggtggtggtg
hsa-miR-127-3p	434 ~ 466	33	ccccaaggtcatggagcgcctcattgaattcgc
hsa-miR-127-3p	288 ~ 315	28	ctgcaggtcaagtaccaggatgcaccgg
hsa-miR-133a	117 ~ 138	22	cctgagggggcaggggacgcgg
hsa-miR-133b	117 ~ 138	22	cctgagggggcaggggacgcgg
hsa-miR-134	91 ~ 112	22	gattcctgcccctgcagtcaca
hsa-miR-134	33 ~ 58	26	atcttctggaaccccatgcagccaga
hsa-miR-135a-3p	467 ~ 488	22	ctacacggcctccatctccatg
hsa-miR-135a-3p	78 ~ 100	23	ggggcctgctgccgattcctgcc
hsa-miR-135a-3p	341 ~ 365	25	ggtgctggcctcatccagccctgtc
hsa-miR-136-3p	122 ~ 143	22	gggggcaggggacgcggtgatg
hsa-miR-138-1-3p	1 ~ 22	22	gtccctgagtgccagaggtggt
hsa-miR-138-1-3p	624 ~ 645	22	cagattggctgtgtggagttgc
hsa-miR-138-2-3p	1 ~ 22	22	gtccctgagtgccagaggtggt
hsa-miR-138-5p	628 ~ 652	25	ttggctgtgtggagttgcaccagcg
hsa-miR-138-5p	566 ~ 594	29	cttcctggtgcagcagctggaccccagca
hsa-miR-139-3p	463 ~ 485	23	tcgcctacacggcctccatctcc
hsa-miR-139-3p	481 ~ 507	27	tctccatgggcgagaagtgtgtcctcc
hsa-miR-139-5p	405 ~ 427	23	atggaggtggtgtccattgaggg
hsa-miR-141-3p	3~30	28	ccctgagtgccagaggtggtggtgttgc
hsa-miR-141-3p	522~550	29	gctgtcatgtaccagatcgacagcgttgt
hsa-miR-143-5p	566 ~ 588	23	cttcctggtgcagcagctggacc
hsa-miR-143-5p	125 ~ 147	23	ggcaggggacgcggtgatgtacg
hsa-miR-143-5p	69 ~ 92	24	agcggggctggggcctgctgccga
hsa-miR-143-5p	11 ~ 33	23	gccagaggtggtggtgttgctta
hsa-miR-145-5p	561 ~ 587	27	agtgacttcctggtgcagcagctggac
hsa-miR-149-3p	165 ~ 184	20	gcggaggtgacgccctccca
hsa-miR-149-3p	80 ~ 101	22	ggcctgctgccgattcctgccc
hsa-miR-149-3p	469 ~ 485	17	acacggcctccatctcc
hsa-miR-149-3p	343 ~ 366	24	tgctggcctcatccagccctgtct
hsa-miR-149-3p	539 ~ 558	20	cgacagcgttgtccgtgcct
hsa-miR-149-5p	392 ~ 415	24	gcgggagcagggcatggaggtggt
hsa-miR-150-3p	515 ~ 536	22	gaacggtgctgtcatgtaccag
hsa-miR-150-3p	361 ~ 385	25	ctgtcttcaaggccatgttcaccaa
hsa-miR-150-3p	280 ~ 305	26	acgtcacactgcaggtcaagtaccag
hsa-miR-150-3p	70 ~ 92	23	gcggggctggggcctgctgccga
hsa-miR-152	516 ~ 536	21	aacggtgctgtcatgtaccag
hsa-miR-154-5p	125 ~ 151	27	ggcaggggacgcggtgatgtacgcctc
hsa-miR-15a-3p	61 ~ 85	25	ccaggcctagcggggctggggcctg
hsa-miR-15a-3p	100 ~ 120	21	ccctgcagtcacagtgccctg
hsa-miR-15a-3p	122 ~ 151	30	gggggcaggggacgcggtgatgtacgcctc
hsa-miR-17-3p	271 ~ 294	24	agctgtgtgacgtcacactgcagg
hsa-miR-17-3p	365 ~ 396	32	cttcaaggccatgttcaccaacgggctgcggg
hsa-miR-17-3p	556 ~ 585	30	cctgcagtgacttcctggtgcagcagctgg
hsa-miR-181c-3p	149 ~ 173	25	ctccactgagtgcaaggcggaggtg
hsa-miR-181c-3p	429 ~ 449	21	atccaccccaaggtcatggag
hsa-miR-182-5p	633 ~ 659	27	tgtgtggagttgcaccagcgtgcccgg
hsa-miR-184	531 ~ 557	27	taccagatcgacagcgttgtccgtgcc
hsa-miR-185-3p	416 ~ 439	24	gtccattgagggtatccaccccaa
hsa-miR-185-3p	211 ~ 238	28	ccctggaggatcataccaagcaggcctt
hsa-miR-185-3p	300 ~ 320	21	taccaggatgcaccggccgcc
hsa-miR-187-3p	386 ~ 408	23	cgggctgcgggagcagggcatgg
hsa-miR-187-3p	117 ~ 138	22	cctgagggggcaggggacgcgg
hsa-miR-187-5p	126 ~ 149	24	gcaggggacgcggtgatgtacgcc
hsa-miR-188-3p	622 ~ 641	20	agcagattggctgtgtggag
hsa-miR-188-3p	103 ~ 126	24	tgcagtcacagtgccctgaggggg
hsa-miR-188-5p	147 ~ 169	23	gcctccactgagtgcaaggcgga
hsa-miR-188-5p	115 ~ 135	21	gccctgagggggcaggggacg
hsa-miR-188-5p	316 ~ 344	29	ccgcccagttcatggcccacaaggtggtg
hsa-miR-188-5p	502 ~ 523	22	tcctccacgtcatgaacggtgc
hsa-miR-18b-3p	404 ~ 429	26	catggaggtggtgtccattgagggta
hsa-miR-191-3p	558 ~ 579	22	tgcagtgacttcctggtgcagc
hsa-miR-193a-3p	69 ~ 87	19	agcggggctggggcctgct
hsa-miR-193a-5p	351 ~ 376	26	tcatccagccctgtcttcaaggccat
hsa-miR-193a-5p	311 ~ 334	24	accggccgcccagttcatggccca
hsa-miR-194-3p	135 ~ 157	23	gcggtgatgtacgcctccactga
hsa-miR-194-3p	438 ~ 460	23	aaggtcatggagcgcctcattga
hsa-miR-194-3p	263 ~ 291	29	cagccagcagctgtgtgacgtcacactgc
hsa-miR-196a-5p	330 ~ 352	23	gcccacaaggtggtgctggcctc
hsa-miR-197-3p	4 ~ 28	25	cctgagtgccagaggtggtggtgtt
hsa-miR-197-3p	398 ~ 418	21	gcagggcatggaggtggtgtc
hsa-miR-197-3p	153 ~ 175	23	actgagtgcaaggcggaggtgac
hsa-miR-197-3p	121 ~ 142	22	agggggcaggggacgcggtgat
hsa-miR-197-5p	79 ~ 102	24	gggcctgctgccgattcctgcccc
hsa-miR-197-5p	644 ~ 674	31	gcaccagcgtgcccgggagtacatctacatg
hsa-miR-197-5p	338 ~ 361	24	ggtggtgctggcctcatccagccc
hsa-miR-197-5p	450 ~ 473	24	cgcctcattgaattcgcctacacg
hsa-miR-198	567 ~ 588	22	ttcctggtgcagcagctggacc
hsa-miR-198	467 ~ 492	26	ctacacggcctccatctccatgggcg
hsa-miR-19b-3p	623 ~ 648	26	gcagattggctgtgtggagttgcacc
hsa-miR-200b-5p	516 ~ 539	24	aacggtgctgtcatgtaccagatc
hsa-miR-200c-3p	646 ~ 667	22	accagcgtgcccgggagtacat
hsa-miR-200c-5p	381 ~ 405	25	accaacgggctgcgggagcagggca
hsa-miR-204-3p	551 ~ 574	24	ccgtgcctgcagtgacttcctggt
hsa-miR-204-3p	166 ~ 186	21	cggaggtgacgccctcccagc
hsa-miR-204-3p	78 ~ 100	23	ggggcctgctgccgattcctgcc
hsa-miR-204-3p	304 ~ 324	21	aggatgcaccggccgcccagt
hsa-miR-205-5p	386 ~ 412	27	cgggctgcgggagcagggcatggaggt
hsa-miR-210	266 ~ 288	23	ccagcagctgtgtgacgtcacac
hsa-miR-210	516 ~ 535	20	aacggtgctgtcatgtacca
hsa-miR-210	312 ~ 337	26	ccggccgcccagttcatggcccacaa
hsa-miR-211-3p	196 ~ 216	21	gcaccttcagctacaccctgg
hsa-miR-212-3p	68 ~ 88	21	tagcggggctggggcctgctg
hsa-miR-21-3p	6 ~ 29	24	tgagtgccagaggtggtggtgttg
hsa-miR-21-3p	620 ~ 644	25	tgagcagattggctgtgtggagttg
hsa-miR-21-3p	327 ~ 347	21	atggcccacaaggtggtgctg
hsa-miR-214-3p	67 ~ 89	23	ctagcggggctggggcctgctgc
hsa-miR-214-3p	541 ~ 563	23	acagcgttgtccgtgcctgcagt
hsa-miR-214-3p	85 ~ 111	27	gctgccgattcctgcccctgcagtcac
hsa-miR-214-5p	108 ~ 132	25	tcacagtgccctgagggggcagggg
hsa-miR-216a	108 ~ 126	19	tcacagtgccctgaggggg
hsa-miR-217	558 ~ 580	23	tgcagtgacttcctggtgcagca
hsa-miR-218-1-3p	568 ~ 591	24	tcctggtgcagcagctggacccca
hsa-miR-218-2-3p	516 ~ 537	22	aacggtgctgtcatgtaccaga
hsa-miR-219-2-3p	303 ~ 327	25	caggatgcaccggccgcccagttca
hsa-miR-23a-5p	26 ~ 47	22	gttgcttatcttctggaacccc
hsa-miR-23a-5p	431 ~ 453	23	ccaccccaaggtcatggagcgcc
hsa-miR-23a-5p	172 ~ 197	26	tgacgccctcccagcatggcaaccgc
hsa-miR-23a-5p	645 ~ 666	22	caccagcgtgcccgggagtaca
hsa-miR-23b-5p	572 ~ 591	20	ggtgcagcagctggacccca
hsa-miR-23b-5p	644 ~ 666	23	gcaccagcgtgcccgggagtaca
hsa-miR-24-3p	61 ~ 83	23	ccaggcctagcggggctggggcc
hsa-miR-26b-3p	379 ~ 402	24	tcaccaacgggctgcgggagcagg
hsa-miR-26b-3p	105 ~ 130	26	cagtcacagtgccctgagggggcagg
hsa-miR-27a-3p	255 ~ 279	25	ctgcggctcagccagcagctgtgtg
hsa-miR-27a-5p	568 ~ 590	23	tcctggtgcagcagctggacccc
hsa-miR-296-3p	343 ~ 363	21	tgctggcctcatccagccctg
hsa-miR-296-3p	193 ~ 215	23	accgcaccttcagctacaccctg
hsa-miR-296-3p	249 ~ 270	22	aacgagctgcggctcagccagc
hsa-miR-296-3p	48 ~ 69	22	atgcagccagatcccaggccta
hsa-miR-296-3p	76 ~ 98	23	ctggggcctgctgccgattcctg
hsa-miR-296-3p	420 ~ 439	20	attgagggtatccaccccaa
hsa-miR-296-5p	61 ~ 85	25	ccaggcctagcggggctggggcctg
hsa-miR-296-5p	398 ~ 420	23	gcagggcatggaggtggtgtcca
hsa-miR-29a-3p	326 ~ 347	22	catggcccacaaggtggtgctg
hsa-miR-29b-1-5p	38 ~ 58	21	ctggaaccccatgcagccaga
hsa-miR-29c-5p	297 ~ 318	22	aagtaccaggatgcaccggccg
hsa-miR-302a-3p	433 ~ 455	23	accccaaggtcatggagcgcctc
hsa-miR-302a-3p	644 ~ 668	25	gcaccagcgtgcccgggagtacatc
hsa-miR-30b-3p	164 ~ 185	22	ggcggaggtgacgccctcccag
hsa-miR-30b-3p	302 ~ 323	22	ccaggatgcaccggccgcccag
hsa-miR-30c-1-3p	164 ~ 185	22	ggcggaggtgacgccctcccag
hsa-miR-30c-1-3p	336 ~ 358	23	aaggtggtgctggcctcatccag
hsa-miR-30c-1-3p	43 ~ 64	22	accccatgcagccagatcccag
hsa-miR-30c-2-3p	167 ~ 185	19	ggaggtgacgccctcccag
hsa-miR-30c-2-3p	43 ~ 64	22	accccatgcagccagatcccag
hsa-miR-30e-3p	272 ~ 294	23	gctgtgtgacgtcacactgcagg
hsa-miR-320a	174 ~ 210	37	acgccctcccagcatggcaaccgcaccttcagctaca
hsa-miR-323a-5p	303 ~ 321	19	caggatgcaccggccgccc
hsa-miR-323a-5p	457 ~ 480	24	ttgaattcgcctacacggcctcca
hsa-miR-323a-5p	433 ~ 454	22	accccaaggtcatggagcgcct
hsa-miR-323a-5p	547 ~ 571	25	ttgtccgtgcctgcagtgacttcct
hsa-miR-323a-5p	246 ~ 267	22	atgaacgagctgcggctcagcc
hsa-miR-323a-5p	646 ~ 667	22	accagcgtgcccgggagtacat
hsa-miR-323a-5p	513 ~ 538	26	atgaacggtgctgtcatgtaccagat
hsa-miR-324-3p	107 ~ 130	24	gtcacagtgccctgagggggcagg
hsa-miR-324-3p	556 ~ 579	24	cctgcagtgacttcctggtgcagc
hsa-miR-324-3p	67 ~ 85	19	ctagcggggctggggcctg
hsa-miR-324-5p	107 ~ 137	31	gtcacagtgccctgagggggcaggggacgcg
hsa-miR-324-5p	58 ~ 80	23	atcccaggcctagcggggctggg
hsa-miR-324-5p	644 ~ 665	22	gcaccagcgtgcccgggagtac
hsa-miR-324-5p	3 ~ 25	23	ccctgagtgccagaggtggtggt
hsa-miR-325	69 ~ 90	22	agcggggctggggcctgctgcc
hsa-miR-326	405 ~ 426	22	atggaggtggtgtccattgagg
hsa-miR-326	636 ~ 663	28	gtggagttgcaccagcgtgcccgggagt
hsa-miR-328	58 ~ 85	28	atcccaggcctagcggggctggggcctg
hsa-miR-328	381 ~ 407	27	accaacgggctgcgggagcagggcatg
hsa-miR-328	405 ~ 431	27	atggaggtggtgtccattgagggtatc
hsa-miR-330-5p	100 ~ 123	24	ccctgcagtcacagtgccctgagg
hsa-miR-330-5p	51 ~ 73	23	cagccagatcccaggcctagcgg
hsa-miR-331-3p	51 ~ 74	24	cagccagatcccaggcctagcggg
hsa-miR-331-5p	207 ~ 230	24	tacaccctggaggatcataccaag
hsa-miR-335-3p	390 ~ 412	23	ctgcgggagcagggcatggaggt
hsa-miR-339-3p	356 ~ 381	26	cagccctgtcttcaaggccatgttca
hsa-miR-339-5p	110 ~ 132	23	acagtgccctgagggggcagggg
hsa-miR-339-5p	381 ~ 404	24	accaacgggctgcgggagcagggc
hsa-miR-339-5p	59 ~ 81	23	tcccaggcctagcggggctgggg
hsa-miR-342-5p	104 ~ 120	17	gcagtcacagtgccctg
hsa-miR-345-3p	353 ~ 373	21	atccagccctgtcttcaaggc
hsa-miR-345-3p	310 ~ 331	22	caccggccgcccagttcatggc
hsa-miR-345-3p	111 ~ 132	22	cagtgccctgagggggcagggg
hsa-miR-345-3p	383 ~ 404	22	caacgggctgcgggagcagggc
hsa-miR-345-5p	113 ~ 130	18	gtgccctgagggggcagg
hsa-miR-345-5p	380 ~ 402	23	caccaacgggctgcgggagcagg
hsa-miR-345-5p	622 ~ 646	25	agcagattggctgtgtggagttgca
hsa-miR-346	100 ~ 132	33	ccctgcagtcacagtgccctgagggggcagggg
hsa-miR-34a-3p	123 ~ 144	22	ggggcaggggacgcggtgatgt
hsa-miR-34a-5p	68 ~ 91	24	tagcggggctggggcctgctgccg
hsa-miR-34a-5p	574 ~ 600	27	tgcagcagctggaccccagcaatgcca
hsa-miR-34a-5p	247 ~ 268	22	tgaacgagctgcggctcagcca
hsa-miR-34b-3p	400 ~ 423	24	agggcatggaggtggtgtccattg
hsa-miR-34b-5p	266 ~ 294	29	ccagcagctgtgtgacgtcacactgcagg
hsa-miR-34c-3p	1 ~ 26	26	gtccctgagtgccagaggtggtggtg
hsa-miR-34c-5p	265 ~ 293	29	gccagcagctgtgtgacgtcacactgcag
hsa-miR-361-3p	199 ~ 220	22	ccttcagctacaccctggagga
hsa-miR-361-3p	99 ~ 125	27	cccctgcagtcacagtgccctgagggg
hsa-miR-361-5p	206 ~ 226	21	ctacaccctggaggatcatac
hsa-miR-362-5p	281 ~ 309	29	cgtcacactgcaggtcaagtaccaggatg
hsa-miR-362-5p	106 ~ 134	29	agtcacagtgccctgagggggcaggggac
hsa-miR-365a-5p	91 ~ 112	22	gattcctgcccctgcagtcaca
hsa-miR-365a-5p	308 ~ 334	27	tgcaccggccgcccagttcatggccca
hsa-miR-365b-5p	92 ~ 112	21	attcctgcccctgcagtcaca
hsa-miR-365b-5p	647 ~ 667	21	ccagcgtgcccgggagtacat
hsa-miR-370	53 ~ 75	23	gccagatcccaggcctagcgggg
hsa-miR-370	250 ~ 274	25	acgagctgcggctcagccagcagct
hsa-miR-370	166 ~ 190	25	cggaggtgacgccctcccagcatgg
hsa-miR-370	214 ~ 235	22	tggaggatcataccaagcaggc
hsa-miR-370	87 ~ 109	23	tgccgattcctgcccctgcagtc
hsa-miR-370	422 ~ 442	21	tgagggtatccaccccaaggt
hsa-miR-371a-3p	7 ~ 29	23	gagtgccagaggtggtggtgttg
hsa-miR-373-3p	431 ~ 455	25	ccaccccaaggtcatggagcgcctc
hsa-miR-375	381 ~ 402	22	accaacgggctgcgggagcagg
hsa-miR-377-5p	459 ~ 479	21	gaattcgcctacacggcctcc
hsa-miR-378a-3p	34 ~ 58	25	tcttctggaaccccatgcagccaga
hsa-miR-378a-5p	108 ~ 132	25	tcacagtgccctgagggggcagggg
hsa-miR-378a-5p	383 ~ 404	22	caacgggctgcgggagcagggc
hsa-miR-382-3p	542 ~ 567	26	cagcgttgtccgtgcctgcagtgact
hsa-miR-422a	91 ~ 114	24	gattcctgcccctgcagtcacagt
hsa-miR-422a	1 ~ 16	16	gtccctgagtgccaga
hsa-miR-422a	33 ~ 58	26	atcttctggaaccccatgcagccaga
hsa-miR-423-3p	233 ~ 256	24	ggcctttggcatcatgaacgagct
hsa-miR-423-3p	338 ~ 360	23	ggtggtgctggcctcatccagcc
hsa-miR-423-3p	405 ~ 427	23	atggaggtggtgtccattgaggg
hsa-miR-423-3p	420 ~ 451	32	attgagggtatccaccccaaggtcatggagcg
hsa-miR-423-3p	73 ~ 95	23	gggctggggcctgctgccgattc
hsa-miR-423-5p	83 ~ 105	23	ctgctgccgattcctgcccctgc
hsa-miR-425-3p	634 ~ 660	27	gtgtggagttgcaccagcgtgcccggg
hsa-miR-92a-1-5p	45 ~ 67	23	cccatgcagccagatcccaggcc
hsa-miR-92a-1-5p	591 ~ 616	26	agcaatgccatcggcatcgccaactt
hsa-miR-92a-1-5p	79 ~ 101	23	gggcctgctgccgattcctgccc
hsa-miR-92a-1-5p	303 ~ 326	24	caggatgcaccggccgcccagttc
hsa-miR-92a-1-5p	572 ~ 595	24	ggtgcagcagctggaccccagcaa
hsa-miR-92a-2-5p	570 ~ 594	25	ctggtgcagcagctggaccccagca
hsa-miR-92a-2-5p	334 ~ 356	23	acaaggtggtgctggcctcatcc
hsa-miR-93-3p	249 ~ 270	22	aacgagctgcggctcagccagc
hsa-miR-93-3p	336 ~ 359	24	aaggtggtgctggcctcatccagc
hsa-miR-9-5p	46 ~ 66	21	ccatgcagccagatcccaggc
hsa-miR-99a-5p	378 ~ 398	21	ttcaccaacgggctgcgggag
hsa-miR-99b-3p	238 ~ 258	21	ttggcatcatgaacgagctgc
hsa-miR-99b-5p	381 ~ 398	18	accaacgggctgcgggag
